# Supplementary material
Source: PubMed Central journal article supplement (PMC1871837)

# Monobody

# MBP

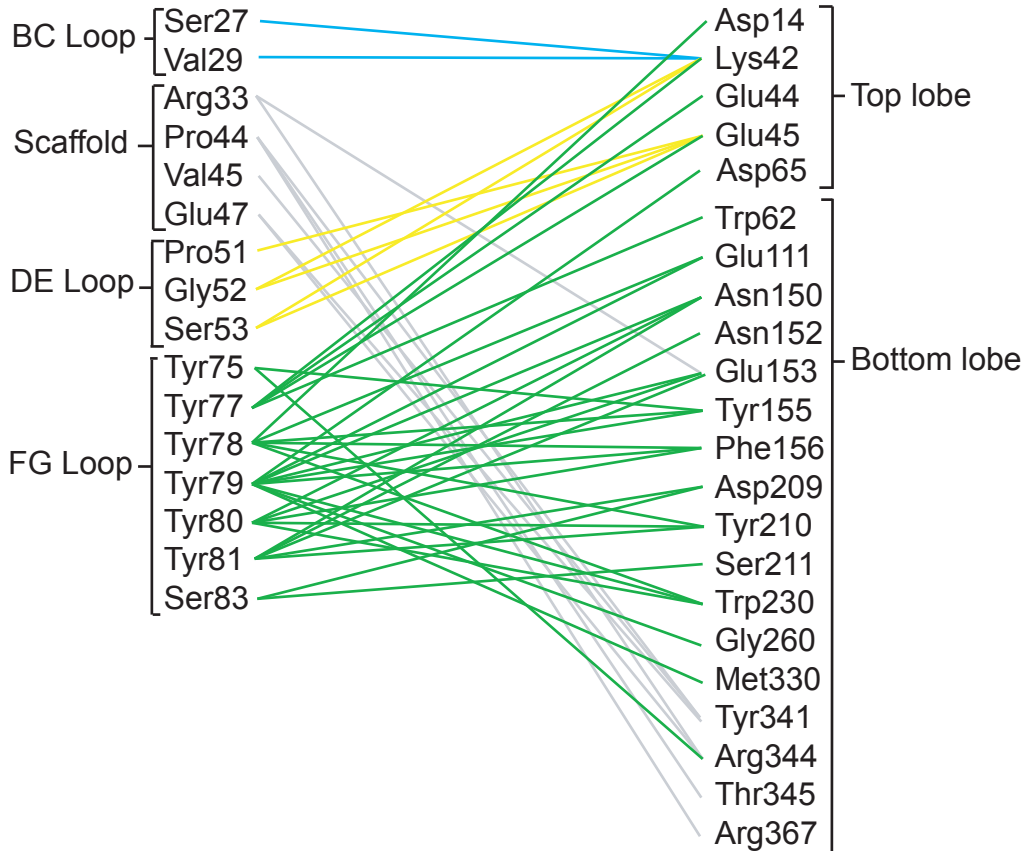

Supplement: pnas_0700149104_2.pdf [file pnas_0700149104_2.pdf]
